1 **Untangling an insect virome from its endogenous viral elements**

2  
3 Paula Rozo-Lopez,<sup>1,\*</sup> William Brewer,<sup>1</sup> Simon Käfer,<sup>2</sup> McKayla M. Martin,<sup>1</sup> & Benjamin J. Parker  
4 <sup>1,\*</sup>

5  
6 <sup>1</sup> Department of Microbiology, University of Tennessee, Knoxville, TN 37916, USA

7  
8 <sup>2</sup> Institut für Biologie und Umweltwissenschaften, Carl von Ossietzky Universität Oldenburg,  
9 26129 Oldenburg, Germany

10  
11 \* authors for correspondence: PRL: [plopez2@utk.edu](mailto:plopez2@utk.edu); BJP: [bjp@utk.edu](mailto:bjp@utk.edu)

12  
13 ORCID: PRL - 0000-0001-9207-6579; SK - 0000-0003-3270-8348; MMM - 0000-0002-7471-  
14 6023; BJP - 0000-0002-0679-4732

15 ABSTRACT

16

17 Insects are an important reservoir of viral biodiversity, but the vast majority of viruses associated  
18 with insects have not been discovered. Recent studies have therefore employed high-  
19 throughput sequencing of RNA, which has led to rapid advances in our understanding of insect  
20 viral diversity. However, insect genomes frequently contain transcribed endogenous viral  
21 elements with significant homology to exogenous viruses, complicating the use of RNAseq for  
22 viral discovery. In this study, we use a multi-pronged sequencing approach to study the virome  
23 of an important agricultural pest and prolific vector of plant pathogens, the potato aphid  
24 *Macrosiphum euphorbiae*. We first used rRNA-reduced RNAseq to characterize the bacteria  
25 and viruses found in individual insects. We then characterized the frequency of a heritable  
26 Flavivirus and an Ambidensovirus in our population. We next generated a quality draft genome  
27 assembly for *M. euphorbiae* using Illumina-corrected Nanopore sequencing. This analysis  
28 showed that the Ambidensovirus, previously described from an RNAseq viral screen, is not a  
29 exogenous virus and instead is a transcribed endogenous viral element in the *M. euphorbiae*  
30 genome. Our study generates key insight into an important agricultural pest and highlights a  
31 widespread challenge for the study of viral diversity using RNAseq.

32

33 KEYWORDS

34

35 Viral discovery; RNAseq; insects; aphids; endogenous viral elements

36 INTRODUCTION

37

38 The last decade has transformed our understanding of the viral communities associated with  
39 insects, the most abundant and diversified animal group [1-4]. Insect viruses have been  
40 primarily studied in the context of vector-borne pathogens, which are transmitted horizontally  
41 between insect vectors and amplifying hosts and often have medical or agricultural relevance.  
42 Other viruses, however, only replicate within the insect and are maintained in natural  
43 populations through horizontal and/or vertical transmission. These insect-specific viruses have  
44 been shown to have important impacts on host biology [5-7], but much work remains to be done  
45 to describe insect-specific viral diversity and uncover the hidden role they play in insect  
46 phenotypes and evolution [8-10].

47

48 To address this gap, researchers have employed high-throughput approaches to viral discovery,  
49 including next-generation sequencing and analysis of RNA. Recent studies have used this  
50 approach to characterize and discover an enormous diversity of viruses [2, 11-15]. However,  
51 there are several serious limitations to this approach. For example, it is unclear from RNAseq  
52 data whether viral reads come from microbes infecting insect cells or if they are present from an  
53 organism ingested by the insect. Another potential challenge with using RNAseq for viral  
54 discovery is that insects often harbor fragments of viral sequences in their genomes. The  
55 endogenous viral elements (EVEs) described to date have homology with multiple clades of  
56 single- and double-stranded DNA and RNA viral families [16]. We have a limited understanding  
57 of the role EVEs are playing in insect biology, but transcriptionally active EVEs have been  
58 shown to play functional roles in regulating host genome stability and as an antiviral defense  
59 against exogenous viruses [17-19]. EVEs are remarkably common across insects [20], and thus  
60 EVEs could represent a widespread challenge facing the field. As such, studies are needed to  
61 uncover the contribution of EVEs to insect 'viromes'.

62

63 Aphids (Hemiptera: Aphidoidea) are hosts to diverse viruses, including plant pathogens with  
64 agricultural significance and insect-specific viruses [21, 22]. Recent studies have used  
65 metatranscriptome sequencing to describe viral diversity in aphids [23-27], and have described  
66 insect-specific DNA viruses in the family Parvoviridae (Ambidensovirus) and RNA viruses in the  
67 Bunyaviruses, Dicistroviruses, Flaviviruses, Iflaviruses, and Mesoviruses families [21].  
68 The potato aphid *Macrosiphum euphorbiae* (Thomas, 1878) is an important cosmopolitan  
69 agricultural pest that infests tomatoes, potatoes, and other economically important crops [28].  
70 *M. euphorbiae* is also an important vector of plant viruses (Families Bromoviridae,  
71 Closteroviridae, Geminiviridae, Potyviridae, and Solemoviridae) and was recently shown to host  
72 several insect-specific viruses belonging to the families Flaviviridae (Flavivirus) and  
73 Parvoviridae [24, 29, 30]. Despite *M. euphorbiae*'s economic importance, no genomic resources  
74 are available outside the body and salivary gland transcriptomes [24, 31, 32].

75

76 The genomes of multiple aphid species have been shown to harbor EVEs that mediate growth,  
77 development, and wing plasticity [33-37]. In this study, we use next-generation sequencing and  
78 molecular techniques to show that aphid EVEs have led to the misidentification of aphid viruses  
79 from RNAseq data. First, we used RNAseq to characterize the microbial diversity of field-  
80 collected *M. euphorbiae* adults, and we found evidence of two insect-specific viruses infecting  
81 aphids collected from the field, including a Flavivirus and Ambidensovirus. Then, we generated  
82 a high-quality draft genome sequence of this species. Our genome showed that insect-specific  
83 Ambidensoviral hits correspond to transcriptionally active EVEs, indicating that a previously  
84 described virus is actually an endogenous viral element in the *M. euphorbiae* genome. Our  
85 results illustrate how careful analysis using multiple methods is needed to untangle insect

86 viromes from EVEs, and this study furthers our understanding of the surprisingly widespread  
87 presence of densoviral EVEs in aphid genomes.

88  
89

## 90 METHODS

91

92 **Aphid collection:** We collected asexual winged and wingless female *M. euphorbiae* adults from  
93 cultivated tomato plants (var Husky Cherry Red) in Knoxville, TN, USA, between April and June  
94 2021 and 2022. We stored individual aphids in 1.5 mL Eppendorf tubes (Eppendorf, Hamburg,  
95 Germany) at -80°C until processing. To validate our ability to identify *M. euphorbiae* (NCBI  
96 TaxID: 13131), we used COI barcoding (LCO1490 5'-GGTCAACAAATCATAAAGATATTGG-3'  
97 and HCO2198 5'-TAACTTCAGGGTGACCAAAAATCA-3'), sanger sequencing, and  
98 comparisons of our COI sequences to the Barcode of Life Data System  
99 (<https://www.boldsystems.org/>) [38]. Our partial COI barcode sequence was uploaded to NCBI  
100 with accession number OQ588703.

101

102 **Cultivation of *M. euphorbiae* strain Me57:** To establish a colony of *M. euphorbiae* in the  
103 laboratory, we used a single asexual female collected in 2021. After colonization, we maintained  
104 this line on tomato plants (Husky Cherry Red) at 20°C 16L:8D. We screened the line for the  
105 seven species of facultative symbionts found in aphids using established PCR protocols [39,  
106 40]. For this screen, we extracted DNA using 'Bender buffer' and ethanol precipitation as in  
107 previous studies [41, 42]. We then used PCR with species-specific primers [39, 43] to screen for  
108 *Hamiltonella defensa*, *Fukatsua symbiotica* (X-type), *Regiella insecticola*, *Rickettsia* sp.,  
109 *Rickettsiella* sp., *Serratia symbiotica*, and *Spiroplasma* sp. following the recommended thermal  
110 profiles (94°C for 2 min, 11 cycles of 94°C for 20 sec, 56°C (declining 1°C each cycle) for 50  
111 sec, 72°C for 30 sec, 25 cycles of 94°C for 2 min, 45°C for 50 sec, 72°C for 2 min, and a final  
112 extension of 72°C for 5 min).

113

114 **RNA extraction and sequencing:** We homogenized individual aphids with a pestle in 500 µL of  
115 TRIzol (Invitrogen; Thermo Fisher Scientific, Inc., Waltham, MA, USA) and extracted total RNA  
116 using BCP (1-bromo-3-chloropropane; Life Technologies, Thermo Fisher Scientific, Inc.,  
117 Waltham, MA, USA) with isopropanol precipitation. We used the Zymo RNA Clean &  
118 Concentrator kit (Zymo Genetics Inc., Seattle, WA, USA) to improve the purity and to remove  
119 gDNA using DNase I. We then performed metatranscriptome Sequencing at Novogene  
120 (Novogene Corporation Inc., Sacramento, CA, USA). Library preparation was conducted using  
121 ribosomal RNA (rRNA) depletion by Illumina TruSeq Stranded Total RNA with Ribo-Zero Plus  
122 and NEBNext rRNA Depletion Kit (Zymo Genetics, Inc., Seattle, WA, USA). The libraries were  
123 sequenced to approximately 9 billion base pairs (bp) per sample with 150 bp paired-end reads  
124 on an Illumina NovaSeq platform. Raw reads were deposited into the NCBI Sequence Read  
125 Archive under BioProject ID PRJNA942253 with BioSample accessions SAMN33770905-  
126 SAMN33770908, and data accessions SRR23870213-SRR23870216.

127

128 **Microbial analysis using CZID:** We assessed the success of ribosomal reduction in the  
129 metatranscriptome libraries using riboPicker [44] and the reference database SILVA\_138 [45]  
130 (supplementary file reads\_report.csv). We then used the CZ ID platform pipeline V7.1  
131 (<https://czid.org>) [46], a cloud-based, open-source bioinformatics platform designed to detect  
132 microbes from metagenomic data. We removed host-specific reads (STAR host subtraction)  
133 using the *Acyrtosiphon pisum* genome [47], trimmed adapters using Trimmomatic [48],  
134 removed low-quality reads with PriceSeqFilter [49], and aligned the remaining reads to the NCBI  
135 NT and NR databases using Minimap2 [50] and Diamond [51]. In parallel, short reads were *de*

136 *novo* assembled using SPADES [52] and mapped back to the resulting contigs using bowtie2  
137 [53] to identify the contig to which each raw read belongs. We used the CZ ID water background  
138 model, which evaluates the significance (z-scores) of relative abundance estimates for microbial  
139 taxa in each sample. Potential bacterial reads were distinguished from contaminating  
140 environmental sequences by establishing z-score metrics  $\geq 10$ , alignment length over 50  
141 matching nucleotides (NT L  $\geq 50$ ), and a minimum of five reads per million aligning to the  
142 reference protein database (NR rPM  $\geq 5$ ). Potential viruses were established by z-score metrics  
143 of  $\geq 1$ , NT L  $\geq 50$ , and NR rPM  $\geq 5$  [46, 54, 55]. Bacterial and viral hits were confirmed with  
144 BLASTX and BLASTN manual searches. Only annotated non-host hits with revised Taxonomy  
145 IDs and BLAST-based match refinement were used for further analysis. The “Macrosiphum  
146 euphorbiae” project is viewable and searchable to anyone in CZ ID.

147  
148 **Densoviral analysis using *de novo* assembly and Travis:** We conducted an additional  
149 screening and viral genome assembly of potential Ambidensovirus using *de novo*  
150 transcriptome assemblies obtained as follows. We used Trimmomatic v.0.39 [48] to trim the  
151 sequence adapters and filtered low-quality/complexity reads, and assessed for post-trimming  
152 quality using FastQC v.0.11.9 [56]. Then, we used Trinity v.2.14 [57] to *de novo* assemble the  
153 remaining reads. We used TRAVIS (v.20221029, <https://github.com/kaefers/travis>) to scan the  
154 assembled transcriptomes for Densovirus-like sequences. We built the reference database  
155 according to the currently accepted Densovirinae (ICTV, 29. Oct 2022, see supplementary file  
156 parvoviridae\_reference\_library.csv), extracted open reading frames between 100 and 2000  
157 amino acids from the assembled transcriptomes, and screened using HMMER v3.3.1 [58],  
158 MMSeqs2 [59], BLASTP v2.12.0 [60], and Diamond v2.0.15 [51]. We set the e-value cutoff at 1  
159  $\times 10^{-6}$ , where applicable. All hits were again searched with Diamond against the non-redundant  
160 protein database (NCBI, downloaded on 29 Oct 2022).

161  
162 **MeV-1 genome analysis:** We used the CZ ID viral consensus genomes pipeline to build a  
163 consensus genome from the sample with MeV-1 present at high levels. In short, contigs were  
164 aligned to the reference MeV-1 genome (NCBI Entry KT309079.1) using minimap2 [50] and  
165 then trimmed using TrimGalore (Phred score  $< 20$ ) [61]. The consensus genome was generated  
166 with iVar consensus using a depth of five or more reads [62].

167  
168 **MeV-1, MeV-2, and *Hamiltonella defensa* screening:** Like all aphids, *M. euphorbiae* hosts an  
169 obligate heritable bacterial symbiont called *Buchnera aphidicola* that synthesizes amino acids  
170 missing from the aphid’s diet of plant phloem, and can also harbor several other facultative  
171 symbiotic bacteria (listed above) [43]. To screen for these microbes, we used 1  $\mu\text{g}$  of total RNA  
172 extracted (as above) from each of the 23 adults collected during 2022 for cDNA synthesis with  
173 iScript cDNA synthesis kit (Bio-Rad Laboratories, Inc., Hercules, CA, USA). To screen for the  
174 Flavivirus Macrosiphum euphorbiae virus 1 (MeV-1), we used 100 ng of cDNA, the primers  
175 MevirF1 (5'-GTACACTTGCCTTACCTTACTGT-3') and MevirR1b (5'-  
176 AACACGGGTCACGACCTTAG-3'), and the PCR conditions previously described [30]. To  
177 screen for the Ambidensovirus Macrosiphum euphorbiae virus 2 (MeV-2), we used 100 ng of  
178 cDNA, the MeV2-F (5'-CCGGATGACAAATCCCACGA-3') and MeV2-R (5'-  
179 AATAGGCGCAGAGATGGACG-3') primers, and the recommended PCR conditions [24]. In  
180 addition, we extracted DNA from colonized Me57 aphids (as above) and used 40 ng of genomic  
181 DNA to screen for MeV-2. The aphid Glyceraldehyde 3-phosphate dehydrogenase (G3PDH)  
182 was used as internal control (primers G3PDH\_F (5'-CGGGAATTTTCATTGAACGAC-3') and  
183 G3PDH\_R (5'-TCCACAACACGGTTGGAGTA-3') [35]).

184  
185 We used 200 ng of the cDNA previously synthesized for MeV-1 and MeV-2 screening and the  
186 protocols for *Hamiltonella defensa* PCR screening (as described above) to evaluate the



187 proportion of field-collected aphids harboring this bacterial symbiont (supplementary file  
188 samples\_metadata.csv). Furthermore, we used a non-parametric (Spearman) correlation to  
189 investigate the potential interaction between *Hamiltonella* and MeV-1.

190  
191 **DNA extraction and sequencing:** We pooled seven genetically identical adult unwinged  
192 aphids from cultivated lab line Me57 and isolated genomic DNA (gDNA) using a  
193 phenol/chloroform extraction. We then sheared the gDNA to approximately 20kb fragments  
194 using Covaris G-tubes (Covaris LLC., Woburn, MA, USA) at 4200 RMP for 1 minute, followed  
195 by tube inversion. For library preparation, we used the NEB Next PPF E repair kit with Ultra II  
196 end prep reaction (New England Biolabs, Ipswich, MA, USA) under recommended conditions  
197 and Nanopore ligation sequencing kit SQK-LSK110. For sequencing, we used a Nanopore  
198 R9.4.1 (FLO-MIN106D) flow cell and a MinION MIN-101B sequencing device (Oxford Nanopore  
199 Technologies, Oxford, UK). We ran the flow cell for 24 hours, followed by a wash with Flow Cell  
200 Wash Kit (EXP-WSH004); we then reloaded the flow cell with a second library prep and ran the  
201 sequencer for an additional 48 hours. We stopped the second sequencing run at 72 hours (~22  
202 Gbps of sequencing). In addition, we performed an additional 5.3 Gb of 150 bp paired-end  
203 sequencing to polish the assembly on an Illumina NovaSeq platform. DNA was extracted as  
204 above, and library prep and sequencing were performed by Novogene Inc. Raw reads were  
205 filtered for low quality and adapter contamination by Novogene Inc.

206  
207 ***M. euphorbiae* whole genome assembly:** We used Guppy (Oxford Nanopore Technologies)  
208 for base-calling and quality trimming raw reads. For the removal of *Buchnera* reads, we used  
209 minimap2 v.2.24 [50] in conjunction with SAMtools v.1.15.1 [63] to map our reads against the  
210 *Buchnera aphidicola* (strain *Macrosiphum euphorbiae*) genome (NCBI accession  
211 NZ\_CP029205) and the corresponding plasmids (NCBI accession number NZ\_CP029203 and  
212 NZ\_CP029204). We only kept unmapped reads for aphid genome assembly. We assembled  
213 Nanopore reads using CANU v.2.0 [64] with an estimated genome size of 541 Mbp. We  
214 removed allelic variants from the assembly using the purge\_haplotigs v.1.1.2 [65], first by  
215 mapping reads to the assembly using minimap2 v2.24-r1122 with Samtools v.1.15.1 and  
216 manually choosing cutoffs for haploid vs. diploid coverage based on a histogram plot (v -l 5 -m  
217 27 -h 60), and then by purging duplicated contigs based on coverage level (-j 80 -s 50). For  
218 assembly polishing, we used the Illumina reads after quality assessment using FastQC V0.11.9  
219 [56]. Then we used these reads to polish the purged assembly using Pilon v.1.24 with default  
220 parameters [66]. We used BlobTools2 [67] to identify remaining contaminating contigs. For this,  
221 we used blast results obtained from the BLASTN function against the NR database using blast  
222 plus v.2.12.0 [68], read coverage obtained by mapping the Illumina reads to the assembly using  
223 minimap2 v.2.24 [50], and GC content in this analysis. Based on these results, we removed all  
224 the short contigs with strong homology to the plant genus *Solanum* (which includes the tomato  
225 host plant species of *M. euphorbiae*) as we suspect these contigs were assembled from host  
226 plant contamination in the guts of sequenced aphids. We also removed two short contigs with  
227 homology to other bacterial contaminants such as *Escherichia coli* and *Pseudomonas* sp.  
228 Lastly, we removed a contig nearly identical to the pLeu plasmid found in *Buchnera aphidicola*  
229 and a small portion of two large contigs matching the *Buchnera* genome. The final annotation  
230 was assessed using BUSCO v.5.3.2 [69] with the MetaEuk gene predictor [70] implemented in  
231 galaxy.org, using the hemiptera\_odb10 (2020-08-05) lineage dataset. The *M. euphorbiae*  
232 genome is available in NCBI with BioProject ID PRJNA942253 and BioSample  
233 SAMN33681650. The raw Nanopore (SRR23851809) and Illumina reads (SRR23919025)  
234 associated with the genome are available through the Sequence Read Archive, and the finished  
235 assembly is available with accession number JARHUA000000000.

236

237 **Characterizing endogenous viral elements in the *M. euphorbiae* genome:** DNA Illumina  
238 raw reads were used as input to the CZ ID platform pipeline V7.1 (<https://czid.org>) and a z-score  
239 metrics of  $\geq 1$  and NT L  $\geq 50$  as described above [46, 54]. Additionally, to screen for actively  
240 transcribed Ambidensovirus-like EVES in the *M. euphorbiae* genome, we used BLASTN  
241 searches using the seven viral hits provided in individual Trinity contigs flagged by TRAVIS  
242 (supplementary file contigs\_TRAVIS.fasta) against the genome scaffolds. All non-redundant hits  
243 from these searches with E-values  $< 1.10^{-3}$  were extracted and used in further analyses [33].  
244

245

## 246 RESULTS

247  
248 **Analysis of non-host sequences detected in single aphid:** We used the pea aphid (*A.*  
249 *pisum*) genome to subtract host reads from our transcriptome data set. On average, 81.8% of  
250 the reads mapped to this host and were subtracted from further analysis (see supplementary file  
251 reads\_report.csv). We then analyzed the remaining distribution of non-pea aphid reads, within a  
252 single *M. euphorbiae* aphid, as the overall proportion of reads assembled into contigs that could  
253 be assigned to bacterial, eukaryotic, and viral taxa (public project *Macrosiphum euphorbiae* at  
254 <https://czid.org>). Bacterial taxa dominated the microbial signature (Figure 1A), and as expected,  
255 the highest number of reads assembled into contigs matched the aphid obligate symbiont  
256 *Buchnera aphidicola* with over 45,000 reads per million aligning to the nucleotide database (NT  
257 rPM>45,000). Reads from an aphid facultative symbiont *Hamiltonella defensa*, were found in  
258 two samples (NT rPM>8,700). One sample (Me152) showed a strong signature of bacterial  
259 contaminants (*E. coli*, *Pseudomonas*, *Halomonas*, and *Agrobacterium*) commonly present in soil  
260 and plant surfaces.  
261

262 In terms of eukaryotes (Figure 1B), we found hits to Solanaceae, which includes the host plant  
263 species of *M. euphorbiae*, and Brachonidae parasitoid wasps (Insecta: Hymenoptera) in two  
264 samples (NT rPM>18,000). *M. euphorbiae* is known to be parasitized by hymenopterous wasps  
265 belonging to the superfamilies Ichneumonoidea (Braconidae) and Chalcidoidea [71]. In addition,  
266 there were some *M. euphorbiae* species-specific reads remaining, which did not map to the pea  
267 aphid reference genome but showed some homology to other aphid species (Insecta:  
268 Hemiptera).  
269

270 We detected the presence of two insect-specific viruses in our metatranscriptome data (Figure  
271 1C). The highest number of hits matched a previously described insect-specific Flavivirus,  
272 called *Macrosiphum euphorbiae* virus 1 (MeV-1), which we detected in two samples (NT rPM =  
273 234 and 4055 for Me112 and Me202, respectively). We also detected viral hits to an insect-  
274 specific Ambidensovirus (Me202 and Me152; NT rPM>60). Other viral reads in our samples  
275 included a Bracovirus in one of the samples that was parasitized with the Brachonidae wasp  
276 (Me202; NT rPM=1) and a Tombusvirus (Me152; NT rPM=2.9), a family of plant pathogenic  
277 viruses with a single-stranded positive-sense RNA genome. Lastly, we detected two phage  
278 genera, the *Hamiltonella*-specific phage APSE (NT rPM>310) in the same samples found  
279 positive for this symbiont (Me112 and Me202) and Acinetobacter phage (NT rPM 0.5-18), a  
280 bacteriophage largely prevalent in the environment [72].  
281

282 **Figure 1.** Details of the per aphid breakdown of non-host reads aligning to specific bacteria  
283 (**Figure 1a**), eukaryotic (**Figure 1b**), and viral (**Figure 1c**) taxa. Reads per million aligning to the  
284 nucleotide database (NT rPM) used as the quantitative metric in the heatmaps (see  
285 supplementary files heatmap\_metrics.csv for metric details).  
286

287 **Comprehensive and quantitative analysis of insect-specific viruses:** Using the CZ ID  
288 platform, we aligned five assembled contigs to the MeV-1 reference genome (NCBI accession  
289 KT309079) and found that they ranged between 85.8-97.2% nucleotide identity to the reference  
290 genome (Figure 2A). Our transcriptome retrieved 17,397 informative nucleotides allowing the  
291 assembly of a nearly complete genome for MeV-1. Our MeV-1 consensus genome has a  
292 coverage breadth of 79% and a coverage depth of 673.2x (NCBI accession OQ504571)  
293 (supplementary figure MeV1\_coverage.tif). This single-stranded positive-sense RNA genome  
294 contains a single large ORF encoding a polyprotein of 7,333 amino acids, which is subsequently  
295 processed to generate structural and non-structural proteins [73]. Previous analysis indicated  
296 that the polyprotein motifs of MeV-1 helicase, methyltransferase, and RdRp are similar to  
297 domains in other *Flavivirus* (family Flaviviridae) [21, 30]. The characteristic secondary structures  
298 (RNA stem-loop) in *Flavivirus* genomes most likely contributed to the 5,283 missing bases in our  
299 MeV-1 consensus genome assembly [74].

300

301 **Figure 2.** Assembled *M. euphorbiae* transcriptome contigs aligning to previously described  
302 insect Flavivirus (**Figure 2a**) and Ambidensovirus (**Figure 2b**) (see supplementary files  
303 contigs\_CZID.fasta and contigs\_TRAVIS.fasta for sequence details).

304

305 In addition, using the CZ ID platform, we detected two contigs with 80% similarity to the non-  
306 structural protein 1 (NS1) of *Dysaphis plantaginea* Densovirus (DpIDNV), single-stranded DNA  
307 insect-specific *Ambidensovirus* (family Parvoviridae) (supplementary file contigs\_CZID.fasta).  
308 Due to the lack of a publicly available genome or partial viral sequences of *Macrosiphum*  
309 *euphorbiae* virus 2 (MeV-2), an Ambidensovirus previously described in the same aphid species  
310 [24], we were not able to explore the homology between both viruses. Therefore, we conducted  
311 a more extensive analysis of our RNAseq data using TRAVIS, a consistency-based virus  
312 detection pipeline for sensitive mass screening of transcriptomic data directed toward  
313 Parvoviridae proteins. While degrees of sequence identity between Densovirinae (a subfamily of  
314 viral species exclusively infecting arthropods) is very low, viral species often express NS1 and  
315 VP proteins, which are useful for parvovirus phylogenetic inferences [75]. We used the seven  
316 viral hits provided in individual Trinity contigs flagged by TRAVIS (supplementary file  
317 contigs\_TRAVIS.fasta) to identify the ORF orientation and similarity and to construct a  
318 hypothetical genome assembly using DpIDNV as the closest reference available (Figure 2B).  
319 We found three contigs with 68.8% to 81.3% similarity to the non-structural ORF1 (encoding for  
320 the NS1 protein) and two contigs with 68.8% to 86.2% similarity to the structural ORF (encoding  
321 for the VP protein). None of the assembled contigs showed similarity to DpIDNV ORF2  
322 (encoding for the NS2 protein). We only detected 70% similarity with the ORF2 of a distantly  
323 related Ambidensovirus (NCBI accession AMG693112), which genomic organization differs  
324 from previously reported aphid densoviruses [21]. Importantly, all densoviral NS1-like  
325 sequences also showed a high nucleotide similarity (72-85%) to the pea aphid APNS-2 (NCBI  
326 accession NC\_042493.1 and NC\_042494.1), an EVE that contributes to wing phenotypic  
327 plasticity in this species [35].

328

329 **Insect-specific virus frequency in natural populations:** To further investigate the infection  
330 frequency of MeV-1 and MeV-2 infections in natural populations, we used a PCR approach to  
331 screen 23 individual adult aphids collected during 2022 as well as aphids from our colonized  
332 *Macrosiphum* line (Me57). We found only 13 field-collected aphids positive for MeV-1 (54.2%)  
333 and 21 aphids (87.5%) positive for MeV-2, including the colonized individuals (Figure 3). We  
334 also tested the cDNA of field-collected aphids (previously screened for MeV-1) for the presence  
335 of *Hamiltonella defensa* and found that 54.2% of the aphids (n=13) were harboring this bacterial  
336 symbiont. We found that 41.7% of individuals (n=10) shared a co-infection between this  
337 Flavivirus and *Hamiltonella* (Figure 3), but this



338 association was not statistically significant (p-value= 0.078; r= 0.375).

339

340 **Figure 3.** Frequency of *Macrosiphum euphorbiae* virus 1 (MeV-1), *Macrosiphum euphorbiae*  
341 virus 2 (MeV-2), and *Hamiltonella defensa* infections in wild-collected (n=23) and colonized  
342 (n=1) aphids. All samples tested using cDNA for PCR screenings.

343

344 **Genome sequencing for analysis of endogenous viral elements (EVEs):** Our laboratory line  
345 (Me57) was found to be PCR positive for MeV-2, and we then used DNA sequences from a  
346 pooled sample of Me57 aphids to look for viral reads. We used the CZ ID platform as above to  
347 identify viral taxa using the Illumina DNA reads from our colonized Me57 aphid line.

348 Surprisingly, we detected only a single contig with a low number of Ambidensovirus hits (NT  
349 rPM>0.329), which also showed 79.0% similarity to the DpIDNV NS1 viral protein and 84.34%  
350 similarity to an uncharacterized genomic transcript in pea aphids (NCBI accession  
351 XM\_029492170.1). Since both of our transcriptome and genomic data were unable to recover a  
352 complete or near-to-complete Ambidensovirus genome, we then suspected that these viral  
353 reads could correspond instead to actively transcribed EVEs, as previously reported in other  
354 closely related aphid species [33, 35].

355

356 To determine with certainty whether the Ambidensovirus hits found in our transcriptome data  
357 corresponded to an actively transcribed EVE, we assembled the first *M. euphorbiae* genome  
358 publicly available. We obtained a total of 4,223,264 nanopore reads (at an average of 5.21kb)  
359 and 35,578,886 Illumina reads (PE 150bp) from sequencing. After assembly, haplotig purging,  
360 polishing, and manual removal of plant and bacterial contigs, our assembly contained 2,176  
361 contigs with an N50 length of 665kb and a total length of 545.7 Mb (Figure 4A). *M. euphorbiae*  
362 has a similar GC content (29.96%; Figure 4B) to other sequenced aphids (e.g., *A. pisum* at  
363 29.6%, *M. persicae* at 30.1%, and *A. glycines* at 27.8%) [76, 77]. The size of our assembly is  
364 close to a recent estimation of the *M. euphorbia* genome size based on flow cytometry which  
365 was estimated at 531.7 Mb [76]. Similarly, an analysis of single-copy orthologs showed our  
366 assembly contains 98.5% complete BUSCOs, with 94% present in single copies and 4.5%  
367 duplicated (Figure 4C). An additional 1.2% of BUSCOs are fragmented, and 0.3% are missing.  
368 Together these results suggest that this draft of the genome is highly complete.

369

370 **Figure 4.** *M. euphorbiae* genome assembly metrics (**Figure 4a**), GC content and coverage  
371 (**Figure 4b**), and BUSCO metrics (**Figure 4c**).

372

373 We used the genome as a reference to screen for the seven individual Trinity contigs flagged by  
374 TRAVIS as potential Ambidensovirus in our previous analysis. Initially, we selected hits with E-  
375 values <  $1.10^{-3}$  [33]; however, most of the 3,044 hits represent shorter sequences rather than  
376 the actual transcript length (see supplementary file expressed\_densoviral\_EVEs.csv); therefore,  
377 we restricted the search to matches consistently to the entire length of each transcript and E-  
378 values=0 (Table 1). No full-length hits in the genome were found for the two largest viral contigs  
379 assembled from transcriptome data (contig3 and contig4); instead, the best hits for these two  
380 contigs corresponded to 16-17% of the total length. In insects, the EVE repertoire varies  
381 between distinct populations of a given species and, in some cases, even between individuals  
382 within the same population [78]. This phenomenon explains why all the field aphid samples  
383 (n=3) that tested negative for MeV-2 by PCR amplified a product of approximately 500 bp,  
384 which is about half of the expected size reported for the primers used. Given that the genome  
385 assemblies and RNAseq data sets were derived from different aphid strains, it is not surprising  
386 the wide range of partial-length Ambidensovirus hits obtained in our analysis. However, we are  
387 confident that five full-length viral transcripts are constitutively expressed from three regions of  
388 the *M. euphorbiae* genome (tig00030708\_pilon, tig00029914\_pilon, and tig00027226\_pilon).

389  
390 **Table 1.** List of Ambidensoviral transcripts and the corresponding integrations in *M. euphorbiae*  
391 genome.

| Transcriptome contig | Transcript length | Percentage of identical sites | Hit end | Hit start | Genome contig     | Query end | Query start |
|----------------------|-------------------|-------------------------------|---------|-----------|-------------------|-----------|-------------|
| Travis_contig1       | 783               | 96.70%                        | 783     | 1         | tig00030708_pilon | 198038    | 197258      |
| Travis_contig1       | 783               | 98.90%                        | 1       | 783       | tig00029914_pilon | 60345     | 59559       |
| Travis_contig2       | 466               | 96.20%                        | 416     | 1         | tig00030708_pilon | 198433    | 198018      |
| Travis_contig2       | 466               | 99.80%                        | 1       | 466       | tig00029914_pilon | 59579     | 59114       |
| Travis_contig3       | 2155              | -                             | -       | -         | -                 | -         | -           |
| Travis_contig4       | 2878              | -                             | -       | -         | -                 | -         | -           |
| Travis_contig5       | 1174              | 99.90%                        | 1       | 1174      | tig00030708_pilon | 92758     | 91585       |
| Travis_contig6       | 1040              | 99.80%                        | 1       | 1040      | tig00030708_pilon | 85562     | 84525       |
| Travis_contig7       | 635               | 100.00%                       | 635     | 1         | tig00030708_pilon | 86191     | 85557       |
| Travis_contig7       | 635               | 84.90%                        | 635     | 1         | tig00027226_pilon | 138266    | 137632      |

392  
393  
394 **DISCUSSION**

395  
396 RNAseq is becoming an essential tool for virus discovery. Our study illustrates how endogenous  
397 viral elements in insect genomes can be an obstacle to using RNAseq for characterizing viral  
398 diversity in arthropods. We used rRNA-depleted RNAseq along with bioinformatic tools to  
399 characterize the virome of an important insect pest species, the potato aphid *Macrosiphum*  
400 *euphorbiae*. Our analysis found two insect-specific viruses from the families Flavivirus and  
401 Ambidensovirus described in previous RNAseq studies. However, by sequencing and  
402 assembling the genome of this insect using long-read sequencing, we found that the  
403 Ambidensovirus is a transcriptionally active EVE rather than an exogenous virus. Endogenous  
404 viral elements encoded in the host genome are abundant in arthropod genomes, and thus EVE  
405 sequences in RNAseq studies are an important consideration for future studies of viral diversity  
406 in arthropods.

407  
408 Densoviral EVEs have been shown to be transcriptionally active in two other aphid species:  
409 *Myzus persicae* and *A. pisum*. In pea aphids, two copies of a transcribed densoviral non-  
410 structural protein (termed the “APNS” genes) were found to be upregulated in response to  
411 crowded conditions and to be functionally linked to the plastic production of wings [35]. These  
412 genes had close homology with the non-structural genes of *Dysaphis plantaginea* densovirus  
413 (DpIDNV), which, when infecting rosy apple aphids, causes them to be winged [79], suggesting  
414 the function of these viral genes had been conserved after endogenization. The transcribed  
415 EVEs we found in *M. euphorbiae* have significant homology to the pea aphid APNS genes, and  
416 it seems likely that these genes may also be playing a role in wing plasticity in *M. euphorbiae*  
417 though additional data is needed.

418  
419 Our study contributes to the growing list of sequenced aphid genomes, which together show  
420 that transcribed densoviral EVEs are common in this insect group [33, 35, 37, 80]. Most  
421 identified EVEs in insect genomes correspond to unclassified single-stranded RNA viruses and  
422 viruses belonging to the families Rhabdoviridae and Parvoviridae [78]. Unlike RNA viruses,

423 which may produce abundant short mRNAs that favor virus endogenization [20], Parvoviruses  
424 undergo a double-stranded DNA intermediate during nuclear replication, which along with the  
425 endonuclease activity of NS1 and the eukaryote double-stranded break repair mechanism may  
426 largely favor endogenization of this virus family [81, 82]. Previous studies have estimated that  
427 around 10% of the parvoviruses described in animals are likely integrated into host genomes,  
428 but in most cases, the EVE status remains uncertain due to unavailable or incomplete genomes  
429 for those species in which transcriptome data is available [75]. Multiple recent studies have  
430 described the presence of “new” densovirus in aphid’s transcriptome [23, 26, 83]; however,  
431 our combined transcriptomic and genomic analyses suggest that some of those viral transcripts  
432 may likely correspond to actively transcribed EVEs instead of heritable exogenous viruses  
433 infecting aphids at very high rates.

434  
435 Last, our study shed light on the biology of MeV-1, an insect-specific Flavivirus (family  
436 Flaviviridae), previously characterized by RNAseq studies of *M. euphorbiae* populations  
437 collected in France [30]. We found that this virus, contrary to previous reports, is present in a  
438 North American population of *M. euphorbiae*, and we found that it is highly prevalent. By  
439 assembling the genome of MeV-1 from our RNAseq data, we found that our local population is  
440 infected with a potentially distinct viral strain from previous studies. No obvious infection  
441 symptoms or abnormal phenotypes were observed in MeV-1-infected *M. euphorbiae* adults, and  
442 future studies are needed to determine what phenotypic effects this virus has on its host. Other  
443 heritable viruses have been found to interact with the secondary symbiotic bacteria found in  
444 aphids [84-86] but we did not find significant patterns of co-infections with the bacterial symbiont  
445 *Hamiltonella defensa*.

446  
447 EVEs are common in insect genomes, and our results highlight this widespread challenge in  
448 studying insect viromes. Our study further emphasizes how combining sequencing  
449 methodologies is necessary to overcome the potential pitfalls of only RNAseq-based viral  
450 discovery. Careful consideration of the biological characteristics and genome structure of  
451 viruses discovered through RNAseq is essential [87]. In aphids and other widely study systems,  
452 the development of cultured cell lines is also imperative to isolate viral species described by  
453 sequence-based methods, to characterize viral replication, and for use in large-scale virus  
454 production that will facilitate future investigation of the complex interaction of aphid viruses and  
455 their hosts [21].

456  
457 The relatively high transcription level of some EVEs suggests that viral integration may have  
458 important biological implications for the fitness of aphids. Likewise, uncovering the phenotypic  
459 effects of accurately described insect-specific viruses may also show promising targets for  
460 alternative control strategies of agriculturally destructive organisms while providing important  
461 foundational resources in the study of host-virus dynamics. Research efforts need to be done on  
462 the evolutionary dynamics of heritable viruses to better understand how they are acting as  
463 hidden drivers of host phenotypes.

464  
465 DATA ACCESSIBILITY: All data is available through CZ ID (Macrosiphum euphorbiae project),  
466 NCBI BioProject ID PRJNA942253, or included as a supplemental file.

467  
468 AUTHORS’ CONTRIBUTIONS: PRL and BJP conceived of the project. PRL and BJP wrote the  
469 manuscript.

470 PRL, WB, SK, BJP carried out the data curation, bioinformatic analysis and software validation.  
471 PRL, WB, MMM carried out the molecular work. BJP contributed to funding acquisition. All  
472 authors edited the manuscript and approved the final version for submission.

473

474 CONFLICT OF INTEREST: We declare we have no competing interests.

475

476 FUNDING: This work was funded by National Science Foundation (NSF) Grant IOS-2152954 to  
477 BJP. BJP is a Pew Scholar in the Biomedical Sciences, funded by the Pew Charitable Trusts.

478

479 ACKNOWLEDGMENTS: Thanks to Keertana Tallapragada, Georgina Aitolo, and Mariam Sirag for  
480 help with insect stock maintenance. The University of Tennessee Knoxville's Office of  
481 Innovative Technologies provided access to the ISAAC-NG computational cluster.

482

483

484

485 REFERENCES

486

- 487 [1] Koonin, E.V. & Dolja, V.V. 2018 Metaviromics: a tectonic shift in understanding virus  
488 evolution. *Virus Research* **246**, A1-A3. (doi:<https://doi.org/10.1016/j.virusres.2018.02.001>).
- 489 [2] Zhang, Y.-Z., Shi, M. & Holmes, E.C. 2018 Using Metagenomics to Characterize an  
490 Expanding Virosphere. *Cell* **172**, 1168-1172. (doi:<https://doi.org/10.1016/j.cell.2018.02.043>).
- 491 [3] Greninger, A.L. 2018 A decade of RNA virus metagenomics is (not) enough. *Virus Research*  
492 **244**, 218-229. (doi:<https://doi.org/10.1016/j.virusres.2017.10.014>).
- 493 [4] Stork, N.E. 2018 How Many Species of Insects and Other Terrestrial Arthropods Are There  
494 on Earth? *Annual Review of Entomology* **63**, 31-45. (doi:10.1146/annurev-ento-020117-  
495 043348).
- 496 [5] Coatsworth, H., Bozic, J., Carrillo, J., Buckner, E.A., Rivers, A.R., Dinglasan, R.R. & Mathias,  
497 D.K. 2022 Intrinsic variation in the vertically transmitted core virome of the mosquito *Aedes*  
498 *aegypti*. *Mol Ecol* **31**, 2545-2561. (doi:10.1111/mec.16412).
- 499 [6] Longdon, B. & Jiggins, F.M. 2012 Vertically transmitted viral endosymbionts of insects: do  
500 sigma viruses walk alone? *Proc Biol Sci* **279**, 3889-3898. (doi:10.1098/rspb.2012.1208).
- 501 [7] Longdon, B., Day, J.P., Schulz, N., Leftwich, P.T., de Jong, M.A., Breuker, C.J., Gibbs, M.,  
502 Obbard, D.J., Wilfert, L., Smith, S.C., et al. 2017 Vertically transmitted rhabdoviruses are found  
503 across three insect families and have dynamic interactions with their hosts. *Proc Biol Sci* **284**.  
504 (doi:10.1098/rspb.2016.2381).
- 505 [8] González, R., Butković, A. & Elena, S.F. 2020 Chapter Three - From foes to friends: Viral  
506 infections expand the limits of host phenotypic plasticity. In *Advances in Virus Research* (eds.  
507 M. Kielian, T.C. Mettenleiter & M.J. Roossinck), pp. 85-121, Academic Press.
- 508 [9] Simmonds, P., Aiewsakun, P. & Katzourakis, A. 2019 Prisoners of war — host adaptation  
509 and its constraints on virus evolution. *Nature Reviews Microbiology* **17**, 321-328.  
510 (doi:10.1038/s41579-018-0120-2).
- 511 [10] Mauck, K.E. 2016 Variation in virus effects on host plant phenotypes and insect vector  
512 behavior: what can it teach us about virus evolution? *Current Opinion in Virology* **21**, 114-123.  
513 (doi:<https://doi.org/10.1016/j.coviro.2016.09.002>).
- 514 [11] Bolling, B.G., Weaver, S.C., Tesh, R.B. & Vasilakis, N. 2015 Insect-Specific Virus  
515 Discovery: Significance for the Arbovirus Community. In *Viruses* (pp. 4911-4928).
- 516 [12] Li, C.-X., Shi, M., Tian, J.-H., Lin, X.-D., Kang, Y.-J., Chen, L.-J., Qin, X.-C., Xu, J., Holmes,  
517 E.C. & Zhang, Y.-Z. 2015 Unprecedented genomic diversity of RNA viruses in arthropods  
518 reveals the ancestry of negative-sense RNA viruses. *eLife* **4**, e05378.  
519 (doi:10.7554/eLife.05378).
- 520 [13] Käfer, S., Paraskevopoulou, S., Zirkel, F., Wieseke, N., Donath, A., Petersen, M., Jones,  
521 T.C., Liu, S., Zhou, X., Middendorf, M., et al. 2019 Re-assessing the diversity of negative strand  
522 RNA viruses in insects. *PLOS Pathogens* **15**, e1008224. (doi:10.1371/journal.ppat.1008224).
- 523 [14] Liu, S., Chen, Y. & Bonning, B.C. 2015 RNA virus discovery in insects. *Current Opinion in*  
524 *Insect Science* **8**, 54-61. (doi:<https://doi.org/10.1016/j.cois.2014.12.005>).
- 525 [15] Wu, H., Pang, R., Cheng, T., Xue, L., Zeng, H., Lei, T., Chen, M., Wu, S., Ding, Y., Zhang,  
526 J., et al. 2020 Abundant and Diverse RNA Viruses in Insects Revealed by RNA-Seq Analysis:  
527 Ecological and Evolutionary Implications. *mSystems* **5**, e00039-00020.  
528 (doi:10.1128/mSystems.00039-20).
- 529 [16] Gilbert, C. & Belliardo, C. 2022 The diversity of endogenous viral elements in insects. *Curr*  
530 *Opin Insect Sci* **49**, 48-55. (doi:10.1016/j.cois.2021.11.007).
- 531 [17] Veglia, A.J., Bistolas, K.S.I., Voolstra, C.R., Hume, B.C.C., Planes, S., Allemand, D.,  
532 Boissin, E., Wincker, P., Poulain, J., Moulin, C., et al. 2022 Endogenous viral elements reveal  
533 associations between a non-retroviral RNA virus and symbiotic dinoflagellate genomes. *bioRxiv*,  
534 2022.2004.2011.487905. (doi:10.1101/2022.04.11.487905).



- 535 [18] Blair, C.D., Olson, K.E. & Bonizzoni, M. 2020 The widespread occurrence and potential  
536 biological roles of endogenous viral elements in insect genomes. *Curr Issues Mol Biol* **34**, 13-  
537 30. (doi:10.21775/cimb.034.013).
- 538 [19] Frank, J.A. & Feschotte, C. 2017 Co-option of endogenous viral sequences for host cell  
539 function. *Curr Opin Virol* **25**, 81-89. (doi:10.1016/j.coviro.2017.07.021).
- 540 [20] Holmes, E.C. 2011 The evolution of endogenous viral elements. *Cell Host Microbe* **10**, 368-  
541 377. (doi:10.1016/j.chom.2011.09.002).
- 542 [21] Guo, Y., Ji, N., Bai, L., Ma, J. & Li, Z. 2022 Aphid viruses: A brief view of a long history.  
543 *Frontiers in Insect Science* **2**. (doi:10.3389/finsc.2022.846716).
- 544 [22] Ray, S. & Casteel, C.L. 2022 Effector-mediated plant–virus–vector interactions. *The Plant*  
545 *Cell* **34**, 1514-1531. (doi:10.1093/plcell/koac058).
- 546 [23] Feng, Y., Krueger, E.N., Liu, S., Dorman, K., Bonning, B.C. & Miller, W.A. 2017 Discovery  
547 of Known and Novel Viral Genomes in Soybean Aphid by Deep Sequencing. *Phytobiomes*  
548 *Journal* **1**, 36-45. (doi:10.1094/PBIOMES-11-16-0013-R).
- 549 [24] Teixeira, M.A., Sela, N., Atamian, H.S., Bao, E., Chaudhary, R., MacWilliams, J., He, J.,  
550 Mantelin, S., Girke, T. & Kaloshian, I. 2018 Sequence analysis of the potato aphid *Macrosiphum*  
551 *euphorbiae* transcriptome identified two new viruses. *PLOS ONE* **13**, e0193239.  
552 (doi:10.1371/journal.pone.0193239).
- 553 [25] Kondo, H., Fujita, M., Hisano, H., Hyodo, K., Andika, I.B. & Suzuki, N. 2020 Virome  
554 Analysis of Aphid Populations That Infest the Barley Field: The Discovery of Two Novel Groups  
555 of Nege/Kita-Like Viruses and Other Novel RNA Viruses. *Frontiers in Microbiology* **11**.  
556 (doi:10.3389/fmicb.2020.00509).
- 557 [26] Li, T., Li, H., Wu, Y., Li, S., Yuan, G. & Xu, P. 2022 Identification of a Novel Densovirus in  
558 Aphid, and Uncovering the Possible Antiviral Process During Its Infection. *Frontiers in*  
559 *Immunology* **13**. (doi:10.3389/fimmu.2022.905628).
- 560 [27] Wamonje, F.O., Michuki, G.N., Braidwood, L.A., Njuguna, J.N., Musembi Mutuku, J.,  
561 Djikeng, A., Harvey, J.J.W. & Carr, J.P. 2017 Viral metagenomics of aphids present in bean and  
562 maize plots on mixed-use farms in Kenya reveals the presence of three dicistroviruses including  
563 a novel Big Sioux River virus-like dicistrovirus. *Virology Journal* **14**, 188. (doi:10.1186/s12985-  
564 017-0854-x).
- 565 [28] Blackman, R.L., Eastop, V.F. & Museum, N.H. 2000 *Aphids on the World's Crops: An*  
566 *Identification and Information Guide*, Wiley.
- 567 [29] Xu, Y. & Gray, S.M. 2020 Aphids and their transmitted potato viruses: A continuous  
568 challenges in potato crops. *Journal of Integrative Agriculture* **19**, 367-375.  
569 (doi:[https://doi.org/10.1016/S2095-3119\(19\)62842-X](https://doi.org/10.1016/S2095-3119(19)62842-X)).
- 570 [30] Teixeira, M., Sela, N., Ng, J., Casteel, C.L., Peng, H.-C., Bekal, S., Girke, T., Ghanim, M. &  
571 Kaloshian, I. 2016 A novel virus from *Macrosiphum euphorbiae* with similarities to members of  
572 the family Flaviviridae. *Journal of General Virology* **97**, 1261-1271.  
573 (doi:<https://doi.org/10.1099/jgv.0.000414>).
- 574 [31] Planelló, R., Llorente, L., Herrero, Ó., Novo, M., Blanco-Sánchez, L., Díaz-Pendón, J.A.,  
575 Fernández-Muñoz, R., Ferrero, V. & de la Peña, E. 2022 Transcriptome analysis of aphids  
576 exposed to glandular trichomes in tomato reveals stress and starvation related responses. *Sci*  
577 *Rep* **12**, 20154. (doi:10.1038/s41598-022-24490-1).
- 578 [32] Atamian, H.S., Chaudhary, R., Cin, V.D., Bao, E., Girke, T. & Kaloshian, I. 2013 In planta  
579 expression or delivery of potato aphid *Macrosiphum euphorbiae* effectors Me10 and Me23  
580 enhances aphid fecundity. *Mol Plant Microbe Interact* **26**, 67-74. (doi:10.1094/mpmi-06-12-  
581 0144-fi).
- 582 [33] Clavijo, G., van Munster, M., Monsion, B., Bochet, N. & Brault, V. 2016 Transcription of  
583 densovirus endogenous sequences in the *Myzus persicae* genome. *Journal of General Virology*  
584 **97**, 1000-1009. (doi:<https://doi.org/10.1099/jgv.0.000396>).

- 585 [34] Jayasinghe, W.H., Kim, H., Nakada, Y. & Masuta, C. 2021 A plant virus satellite RNA  
586 directly accelerates wing formation in its insect vector for spread. *Nature Communications* **12**,  
587 7087. (doi:10.1038/s41467-021-27330-4).
- 588 [35] Parker, B.J. & Brisson, J.A. 2019 A laterally transferred viral gene modifies aphid wing  
589 plasticity. *Current Biology* **29**, 2098-2103.e2095. (doi:<https://doi.org/10.1016/j.cub.2019.05.041>).
- 590 [36] Shang, F., Niu, J., Ding, B.-Y., Zhang, W., Wei, D.-D., Wei, D., Jiang, H.-B. & Wang, J.-J.  
591 2020 The miR-9b microRNA mediates dimorphism and development of wing in aphids.  
592 *Proceedings of the National Academy of Sciences* **117**, 8404-8409.  
593 (doi:10.1073/pnas.1919204117).
- 594 [37] Liu, S., Coates, B.S. & Bonning, B.C. 2020 Endogenous viral elements integrated into the  
595 genome of the soybean aphid, *Aphis glycines*. *Insect Biochem Mol Biol* **123**, 103405.  
596 (doi:10.1016/j.ibmb.2020.103405).
- 597 [38] Footitt, R.G., Maw, H.E., CD, V.O.N.D. & Hebert, P.D. 2008 Species identification of aphids  
598 (Insecta: Hemiptera: Aphididae) through DNA barcodes. *Mol Ecol Resour* **8**, 1189-1201.  
599 (doi:10.1111/j.1755-0998.2008.02297.x).
- 600 [39] Henry, L.M., Peccoud, J., Simon, J.C., Hadfield, J.D., Maiden, M.J., Ferrari, J. & Godfray,  
601 H.C. 2013 Horizontally transmitted symbionts and host colonization of ecological niches. *Curr*  
602 *Biol* **23**, 1713-1717. (doi:10.1016/j.cub.2013.07.029).
- 603 [40] McLean, A.H.C., Hrcek, J., Parker, B.J., Mathe-Hubert, H., Kaeck, H., Paine, C. & Godfray,  
604 H.C.J. 2020 Multiple phenotypes conferred by a single insect symbiont are independent. *Proc*  
605 *Biol Sci* **287**, 20200562. (doi:10.1098/rspb.2020.0562).
- 606 [41] Goldstein, E.B., de Anda Acosta, Y., Henry, L.M. & Parker, B.J. 2022 Variation in density,  
607 immune gene suppression, and co-infection outcomes among strains of the aphid endosymbiont  
608 *Regiella insecticola*. *bioRxiv*, 2022.2008.2028.505589.  
609 (doi:10.1101/2022.08.28.505589).
- 610 [42] Bender, W., Spierer, P., Hogness, D.S. & Chambon, P. 1983 Chromosomal walking and  
611 jumping to isolate DNA from the *Ace* and *rosy* loci and the bithorax complex in *Drosophila*  
612 *melanogaster*. *Journal of Molecular Biology* **168**, 17-33. (doi:[https://doi.org/10.1016/S0022-](https://doi.org/10.1016/S0022-2836(83)80320-9)  
613 [2836\(83\)80320-9](https://doi.org/10.1016/S0022-2836(83)80320-9)).
- 614 [43] Henry, L.M., Maiden, M.C.J., Ferrari, J. & Godfray, H.C.J. 2015 Insect life history and the  
615 evolution of bacterial mutualism. *Ecology Letters* **18**, 516-525.  
616 (doi:<https://doi.org/10.1111/ele.12425>).
- 617 [44] Schmieder, R., Lim, Y.W. & Edwards, R. 2012 Identification and removal of ribosomal RNA  
618 sequences from metatranscriptomes. *Bioinformatics* **28**, 433-435.  
619 (doi:10.1093/bioinformatics/btr669).
- 620 [45] Pruesse, E., Quast, C., Knittel, K., Fuchs, B.M., Ludwig, W., Peplies, J. & Glöckner, F.O.  
621 2007 SILVA: a comprehensive online resource for quality checked and aligned ribosomal RNA  
622 sequence data compatible with ARB. *Nucleic Acids Research* **35**, 7188-7196.  
623 (doi:10.1093/nar/gkm864).
- 624 [46] Kalantar, K.L., Carvalho, T., de Bourcy, C.F.A., Dimitrov, B., Dingle, G., Egger, R., Han, J.,  
625 Holmes, O.B., Juan, Y.-F., King, R., et al. 2020 IDseq—An open source cloud-based pipeline  
626 and analysis service for metagenomic pathogen detection and monitoring. *GigaScience* **9**.  
627 (doi:10.1093/gigascience/giaa111).
- 628 [47] Dobin, A., Davis, C.A., Schlesinger, F., Drenkow, J., Zaleski, C., Jha, S., Batut, P.,  
629 Chaisson, M. & Gingeras, T.R. 2012 STAR: ultrafast universal RNA-seq aligner. *Bioinformatics*  
630 **29**, 15-21. (doi:10.1093/bioinformatics/bts635).
- 631 [48] Bolger, A.M., Lohse, M. & Usadel, B. 2014 Trimmomatic: a flexible trimmer for Illumina  
632 sequence data. *Bioinformatics* **30**, 2114-2120. (doi:10.1093/bioinformatics/btu170).
- 633 [49] Ruby, J.G., Bellare, P. & Derisi, J.L. 2013 PRICE: software for the targeted assembly of  
634 components of (Meta) genomic sequence data. *G3 (Bethesda)* **3**, 865-880.  
635 (doi:10.1534/g3.113.005967).

- 636 [50] Li, H. 2018 Minimap2: pairwise alignment for nucleotide sequences. *Bioinformatics* **34**,  
637 3094-3100. (doi:10.1093/bioinformatics/bty191).
- 638 [51] Buchfink, B., Reuter, K. & Drost, H.G. 2021 Sensitive protein alignments at tree-of-life scale  
639 using DIAMOND. *Nat Methods* **18**, 366-368. (doi:10.1038/s41592-021-01101-x).
- 640 [52] Bankevich, A., Nurk, S., Antipov, D., Gurevich, A.A., Dvorkin, M., Kulikov, A.S., Lesin, V.M.,  
641 Nikolenko, S.I., Pham, S., Pribelski, A.D., et al. 2012 SPAdes: a new genome assembly  
642 algorithm and its applications to single-cell sequencing. *J Comput Biol* **19**, 455-477.  
643 (doi:10.1089/cmb.2012.0021).
- 644 [53] Langmead, B. & Salzberg, S.L. 2012 Fast gapped-read alignment with Bowtie 2. *Nat*  
645 *Methods* **9**, 357-359. (doi:10.1038/nmeth.1923).
- 646 [54] Bohl, J.A., Lay, S., Chea, S., Ah Yong, V., Parker, D.M., Gallagher, S., Fintzi, J., Man, S.,  
647 Ponce, A., Sreng, S., et al. 2022 Discovering disease-causing pathogens in resource-scarce  
648 Southeast Asia using a global metagenomic pathogen monitoring system. *Proc Natl Acad Sci U*  
649 *S A* **119**, e2115285119. (doi:10.1073/pnas.2115285119).
- 650 [55] Batson, J., Dudas, G., Haas-Stapleton, E., Kistler, A.L., Li, L.M., Logan, P., Ratnasiri, K. &  
651 Retallack, H. 2021 Single mosquito metatranscriptomics identifies vectors, emerging pathogens  
652 and reservoirs in one assay. *eLife* **10**, e68353. (doi:10.7554/eLife.68353).
- 653 [56] Andrews, S. 2010 FastQC: A Quality Control Tool for High Throughput Sequence Data  
654 [Online]. (<http://www.bioinformatics.babraham.ac.uk/projects/fastqc/>).
- 655 [57] Grabherr, M.G., Haas, B.J., Yassour, M., Levin, J.Z., Thompson, D.A., Amit, I., Adiconis, X.,  
656 Fan, L., Raychowdhury, R., Zeng, Q., et al. 2011 Full-length transcriptome assembly from RNA-  
657 Seq data without a reference genome. *Nature Biotechnology* **29**, 644-652.  
658 (doi:10.1038/nbt.1883).
- 659 [58] Wheeler, T.J. & Eddy, S.R. 2013 nhmmer: DNA homology search with profile HMMs.  
660 *Bioinformatics* **29**, 2487-2489. (doi:10.1093/bioinformatics/btt403).
- 661 [59] Steinegger, M. & Söding, J. 2017 MMseqs2 enables sensitive protein sequence searching  
662 for the analysis of massive data sets. *Nat Biotechnol* **35**, 1026-1028. (doi:10.1038/nbt.3988).
- 663 [60] Altschul, S.F., Madden, T.L., Schäffer, A.A., Zhang, J., Zhang, Z., Miller, W. & Lipman, D.J.  
664 1997 Gapped BLAST and PSI-BLAST: a new generation of protein database search programs.  
665 *Nucleic Acids Res* **25**, 3389-3402. (doi:10.1093/nar/25.17.3389).
- 666 [61] Martin, M. 2011 Cutadapt removes adapter sequences from high-throughput sequencing  
667 reads. *2011* **17**, 3. (doi:10.14806/ej.17.1.200).
- 668 [62] Grubaugh, N.D., Gangavarapu, K., Quick, J., Matteson, N.L., De Jesus, J.G., Main, B.J.,  
669 Tan, A.L., Paul, L.M., Brackney, D.E., Grewal, S., et al. 2019 An amplicon-based sequencing  
670 framework for accurately measuring intrahost virus diversity using PrimalSeq and iVar. *Genome*  
671 *Biology* **20**, 8. (doi:10.1186/s13059-018-1618-7).
- 672 [63] Li, H., Handsaker, B., Wysoker, A., Fennell, T., Ruan, J., Homer, N., Marth, G., Abecasis,  
673 G. & Durbin, R. 2009 The Sequence Alignment/Map format and SAMtools. *Bioinformatics* **25**,  
674 2078-2079. (doi:10.1093/bioinformatics/btp352).
- 675 [64] Koren, S., Walenz, B.P., Berlin, K., Miller, J.R., Bergman, N.H. & Phillippy, A.M. 2017 Canu:  
676 scalable and accurate long-read assembly via adaptive k-mer weighting and repeat separation.  
677 *Genome Res* **27**, 722-736. (doi:10.1101/gr.215087.116).
- 678 [65] Roach, M.J., Schmidt, S.A. & Borneman, A.R. 2018 Purge Haplotigs: allelic contig  
679 reassignment for third-gen diploid genome assemblies. *BMC Bioinformatics* **19**, 460.  
680 (doi:10.1186/s12859-018-2485-7).
- 681 [66] Walker, B.J., Abeel, T., Shea, T., Priest, M., Abouelliel, A., Sakthikumar, S., Cuomo, C.A.,  
682 Zeng, Q., Wortman, J., Young, S.K., et al. 2014 Pilon: An Integrated Tool for Comprehensive  
683 Microbial Variant Detection and Genome Assembly Improvement. *PLOS ONE* **9**, e112963.  
684 (doi:10.1371/journal.pone.0112963).



- 685 [67] Challis, R., Richards, E., Rajan, J., Cochrane, G. & Blaxter, M. 2020 BlobToolKit –  
686 Interactive Quality Assessment of Genome Assemblies. *G3 Genes/Genomes/Genetics* **10**,  
687 1361-1374. (doi:10.1534/g3.119.400908).
- 688 [68] Sayers, E.W., Bolton, E.E., Brister, J.R., Canese, K., Chan, J., Comeau, D.C., Connor, R.,  
689 Funk, K., Kelly, C., Kim, S., et al. 2022 Database resources of the national center for  
690 biotechnology information. *Nucleic Acids Res* **50**, D20-d26. (doi:10.1093/nar/gkab1112).
- 691 [69] Manni, M., Berkeley, M.R., Seppey, M., Simão, F.A. & Zdobnov, E.M. 2021 BUSCO  
692 Update: Novel and Streamlined Workflows along with Broader and Deeper Phylogenetic  
693 Coverage for Scoring of Eukaryotic, Prokaryotic, and Viral Genomes. *Molecular Biology and  
694 Evolution* **38**, 4647-4654. (doi:10.1093/molbev/msab199).
- 695 [70] Levy Karin, E., Mirdita, M. & Söding, J. 2020 MetaEuk—sensitive, high-throughput gene  
696 discovery, and annotation for large-scale eukaryotic metagenomics. *Microbiome* **8**, 48.  
697 (doi:10.1186/s40168-020-00808-x).
- 698 [71] Clarke, H.V. 2013 Genotypic and endosymbiont-mediated variation in parasitoid  
699 susceptibility and other fitness traits of the potato aphid, *Macrosiphum euphorbiae*. (  
700 [72] Turner, D., Ackermann, H.W., Kropinski, A.M., Lavigne, R., Sutton, J.M. & Reynolds, D.M.  
701 2017 Comparative Analysis of 37 *Acinetobacter* Bacteriophages. *Viruses* **10**.  
702 (doi:10.3390/v10010005).
- 703 [73] Blitvich, B.J. & Firth, A.E. 2015 Insect-specific flaviviruses: a systematic review of their  
704 discovery, host range, mode of transmission, superinfection exclusion potential and genomic  
705 organization. *Viruses* **7**, 1927-1959. (doi:10.3390/v7041927).
- 706 [74] Mazeaud, C., Freppel, W. & Chatel-Chaix, L. 2018 The Multiples Fates of the Flavivirus  
707 RNA Genome During Pathogenesis. *Frontiers in Genetics* **9**. (doi:10.3389/fgene.2018.00595).
- 708 [75] François, S., Filloux, D., Roumagnac, P., Bigot, D., Gayral, P., Martin, D.P., Froissart, R. &  
709 Ogliastro, M. 2016 Discovery of parvovirus-related sequences in an unexpected broad range of  
710 animals. *Scientific Reports* **6**, 30880. (doi:10.1038/srep30880).
- 711 [76] Wenger, J.A., Cassone, B.J., Legeai, F., Johnston, J.S., Bansal, R., Yates, A.D., Coates,  
712 B.S., Pavinato, V.A. & Michel, A. 2017 Whole genome sequence of the soybean aphid, *Aphis  
713 glycines*. *Insect Biochem Mol Biol*. (doi:10.1016/j.ibmb.2017.01.005).
- 714 [77] International Aphid Genomics, C. 2010 Genome sequence of the pea aphid *Acyrtosiphon  
715 pisum*. *PLoS Biol* **8**, e1000313. (doi:10.1371/journal.pbio.1000313).
- 716 [78] Horst, A.M.t., Nigg, J.C., Dekker, F.M. & Falk, B.W. 2019 Endogenous Viral Elements Are  
717 Widespread in Arthropod Genomes and Commonly Give Rise to PIWI-Interacting RNAs.  
718 *Journal of Virology* **93**, e02124-02118. (doi:doi:10.1128/JVI.02124-18).
- 719 [79] Ryabov, E.V., Keane, G., Naish, N., Evered, C. & Winstanley, D. 2009 Densovirus induces  
720 winged morphs in asexual clones of the rosy apple aphid, *Dysaphis plantaginea*. *Proceedings of  
721 the National Academy of Sciences* **106**, 8465-8470. (doi:doi:10.1073/pnas.0901389106).
- 722 [80] Nigg, J.C., Kuo, Y.W. & Falk, B.W. 2020 Endogenous viral element-derived piwi-interacting  
723 RNAs (piRNAs) are not required for production of ping-pong-dependent piRNAs from  
724 *Diaphorina citri* Densovirus. *mBio* **11**. (doi:10.1128/mBio.02209-20).
- 725 [81] Kapoor, A., Simmonds, P. & Lipkin, W.I. 2010 Discovery and characterization of  
726 mammalian endogenous parvoviruses. *J Virol* **84**, 12628-12635. (doi:10.1128/jvi.01732-10).
- 727 [82] Liu, H., Fu, Y., Xie, J., Cheng, J., Ghabrial, S.A., Li, G., Peng, Y., Yi, X. & Jiang, D. 2011  
728 Widespread endogenization of densoviruses and parvoviruses in animal and human genomes.  
729 *J Virol* **85**, 9863-9876. (doi:10.1128/jvi.00828-11).
- 730 [83] Pinheiro, P.V., Wilson, J.R., Xu, Y., Zheng, Y., Rebelo, A.R., Fattah-Hosseini, S., Kruse, A.,  
731 Dos Silva, R.S., Xu, Y., Kramer, M., et al. 2019 Plant viruses transmitted in two different modes  
732 produce differing effects on small RNA-mediated processes in their aphid vector. *Phytobiomes  
733 Journal* **3**, 71-81. (doi:10.1094/pbiomes-10-18-0045-r).
- 734 [84] Altinli, M., Schnettler, E. & Sicard, M. 2021 Symbiotic Interactions Between Mosquitoes and  
735 Mosquito Viruses. *Front Cell Infect Microbiol* **11**, 694020. (doi:10.3389/fcimb.2021.694020).

- 736 [85] Wu, W., Shan, H.W., Li, J.M., Zhang, C.X., Chen, J.P. & Mao, Q. 2022 Roles of Bacterial  
737 Symbionts in Transmission of Plant Virus by Hemipteran Vectors. *Front Microbiol* **13**, 805352.  
738 (doi:10.3389/fmicb.2022.805352).  
739 [86] Jia, D., Mao, Q., Chen, Y., Liu, Y., Chen, Q., Wu, W., Zhang, X., Chen, H., Li, Y. & Wei, T.  
740 2017 Insect symbiotic bacteria harbour viral pathogens for transovarial transmission. *Nature*  
741 *Microbiology* **2**, 17025. (doi:10.1038/nmicrobiol.2017.25).  
742 [87] Depledge, D.P., Mohr, I. & Wilson, A.C. 2019 Going the Distance: Optimizing RNA-Seq  
743 Strategies for Transcriptomic Analysis of Complex Viral Genomes. *J Virol* **93**.  
744 (doi:10.1128/jvi.01342-18).  
745



### A Bacteria

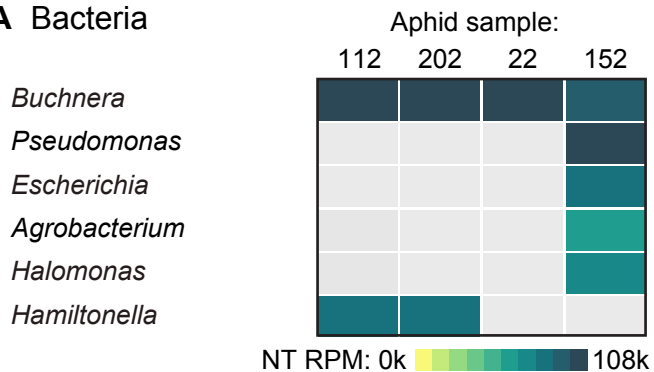

### B Eukaryotes

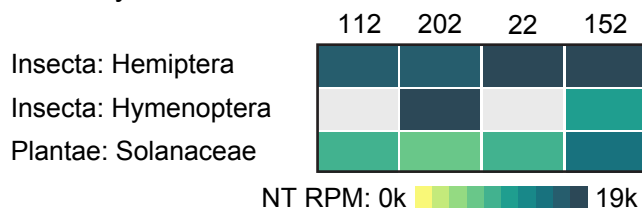

### C Viruses

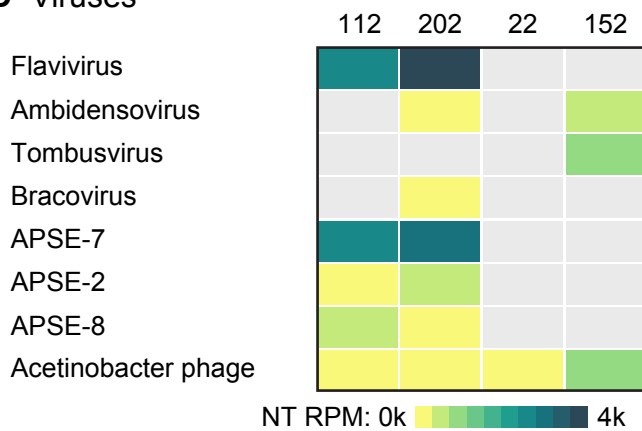

**A: Macrosiphum euphorbiae virus 1**  
(NCBI Reference Sequence NC\_028137.1)

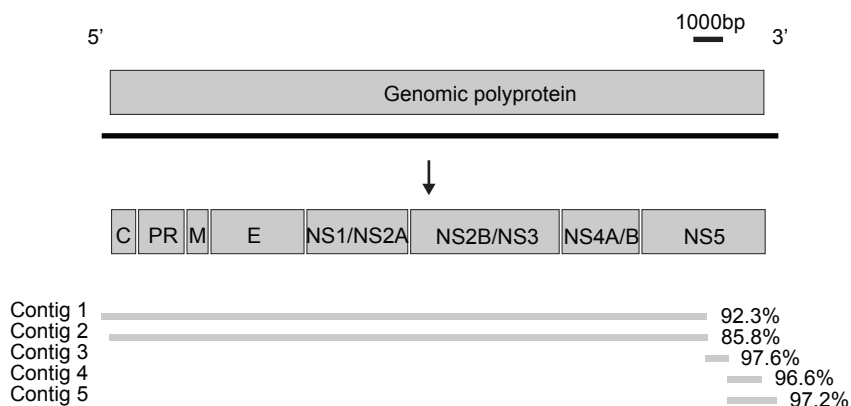

**B: Dysaphis plantaginea Densovirus**  
(NCBI Reference Sequence NC\_034532.1)

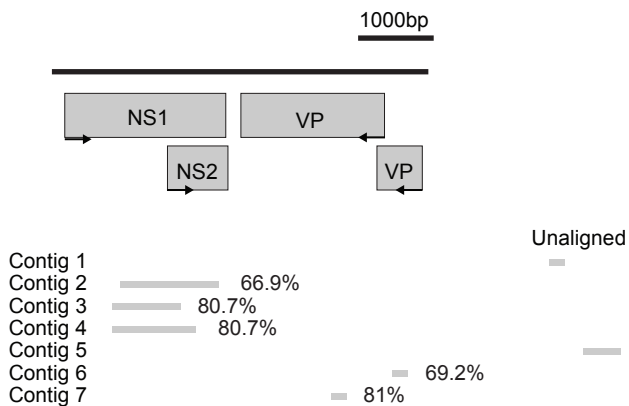

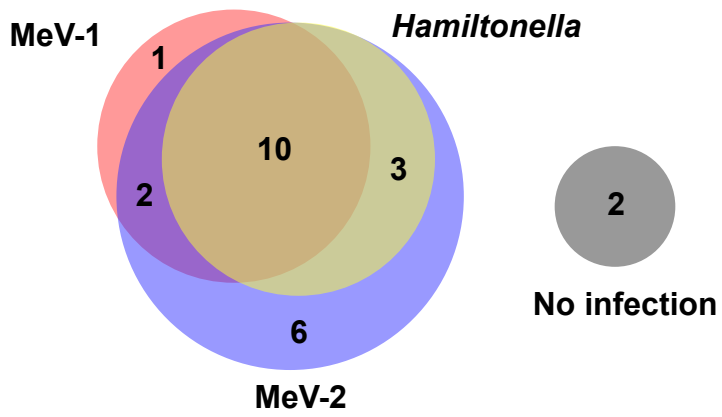

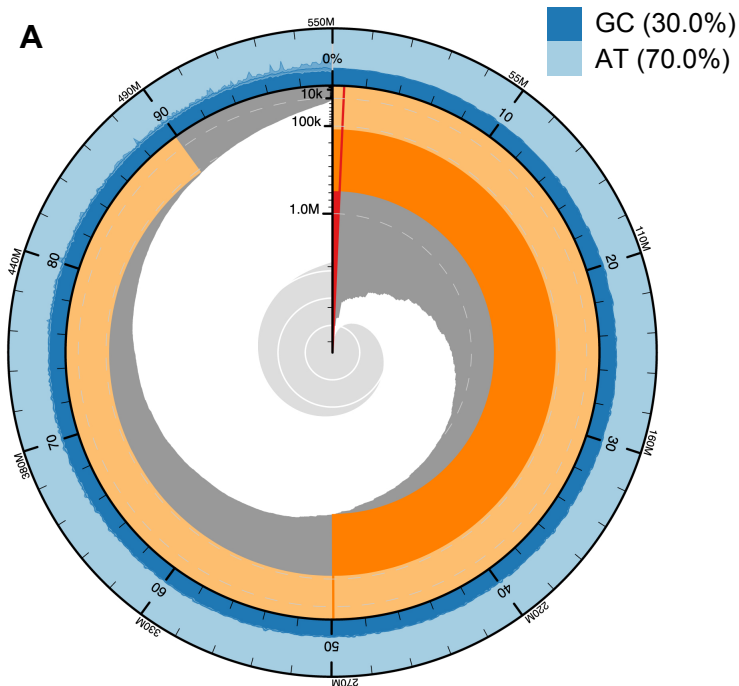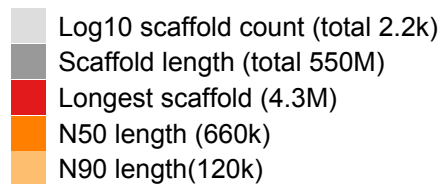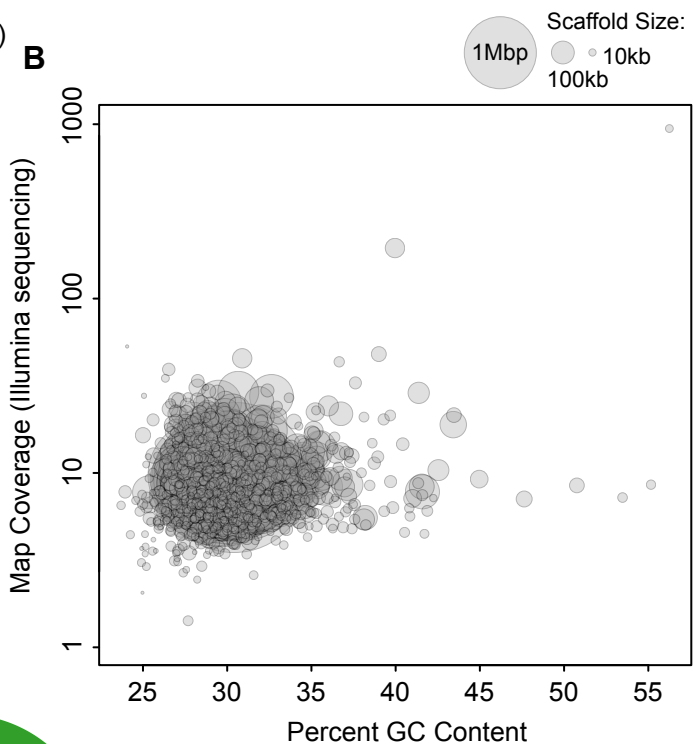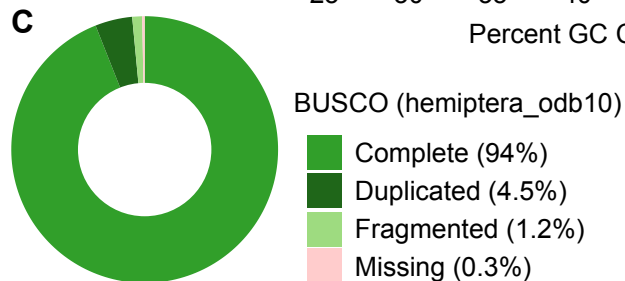

Source: https://www.biorxiv.org/content/10.1101/2023.05.23.541933v1.full.pdf
